# Supplementary material for: Separation of biospheric and fossil fuel fluxes of CO 2 by atmospheric inversion of CO 2 and 14 CO 2 measurements: Observation System Simulations
Source: Copernicus journal article supplement (doi:10.5194/acp-16-5665-2016), 2016-05-10
Supplement: Supplementary file 1 [file acp-16-5665-2016-supplement.zip]

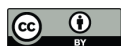

*Supplement of*

## **Separation of biospheric and fossil fuel fluxes of CO<sub>2</sub> by atmospheric inversion of CO<sub>2</sub> and <sup>14</sup>CO<sub>2</sub> measurements: Observation System Simulations**

**Sourish Basu et al.**

*Correspondence to:* Sourish Basu ([sourish.basu@noaa.gov](mailto:sourish.basu@noaa.gov))

- [acp-16-5665-2016-supplement-title-page.pdf](#)
- [SF6\\_aircraft\\_profiles.zip](#)
- [SF6\\_marine\\_boundary\\_layer.zip](#)

The copyright of individual parts of the supplement might differ from the CC-BY 3.0 licence.
